# Supplementary material for: Rv0613c/MSMEG_1285 Interacts with HBHA and Mediates Its Proper Cell-Surface Exposure in Mycobacteria
Source: MDPI journal article supplement (doi:10.3390/ijms19061673), 2018-06-05
Supplement: s1 [file s1]

# Supplementary Files

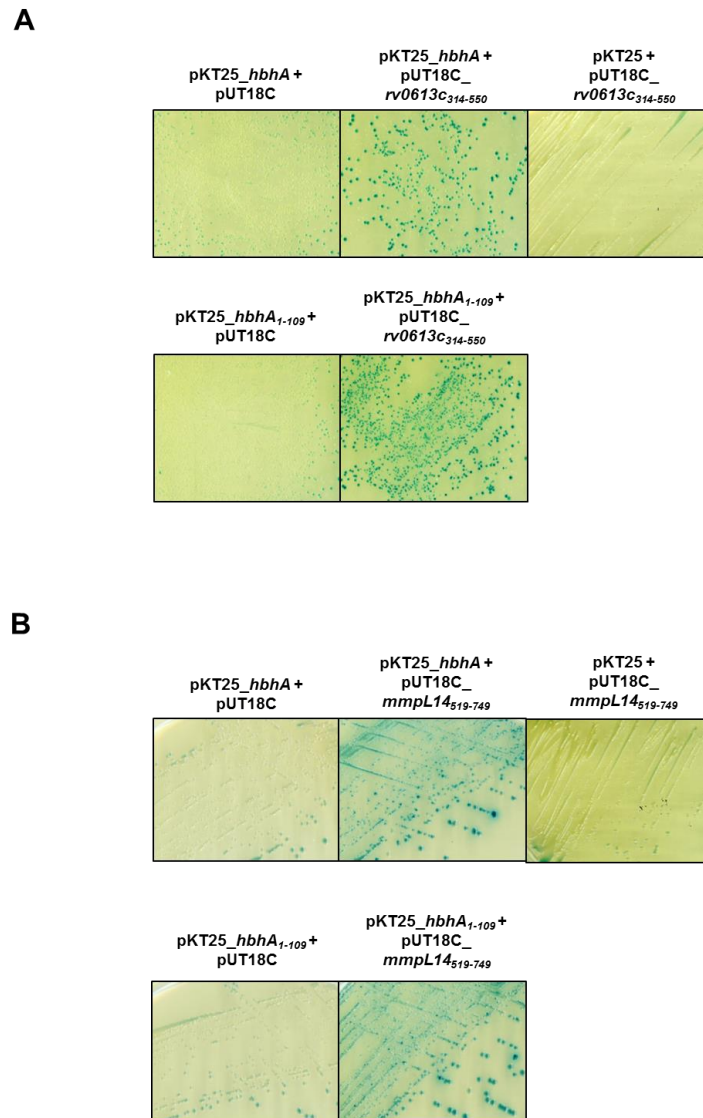

**Supplementary Figure S1.** HBHA interacts with Rv0613c and MmpL14 in the BACTH system. (A) Blue colony phenotype observed on LB agar plates supplemented with IPTG and X-gal for *E. coli* transformed with pKT25\_ *hbhA* and pUT18C\_ *rv0613C*<sub>314-550</sub> (upper panel, middle) and for *E. coli* transformed with pKT25\_ *hbhA*<sub>1-109</sub> and pUT18C\_ *rv0613C*<sub>314-550</sub> (lower panel, right) in contrast to the *E. coli* transformed with pKT25\_ *hbhA* and pUT18C (upper panel, left), *E. coli* transformed with pKT25\_ *hbhA*<sub>1-109</sub> and pUT18C (lower panel, left) and *E. coli* transformed with pKT25 and pUT18C\_ *rv0613C*<sub>314-550</sub> (upper panel, right); (B) Blue colony phenotype observed on LB agar plates supplemented with IPTG and X-gal for *E. coli* transformed with pKT25\_ *hbhA* and pUT18C\_ *mmpL14*<sub>519-749</sub> (upper panel, middle) and *E. coli* transformed with pKT25\_ *hbhA*<sub>1-109</sub> and pUT18C\_ *mmpL14*<sub>519-749</sub> (lower panel, right) in contrast to the *E. coli* transformed with pKT25\_ *hbhA* pUT18C (upper panel, left), *E. coli* transformed with pKT25\_ *hbhA*<sub>1-109</sub> and pUT18C (lower panel, left) and *E. coli* transformed with pKT25 and pUT18C\_ *mmpL14*<sub>519-749</sub> (upper panel, right).

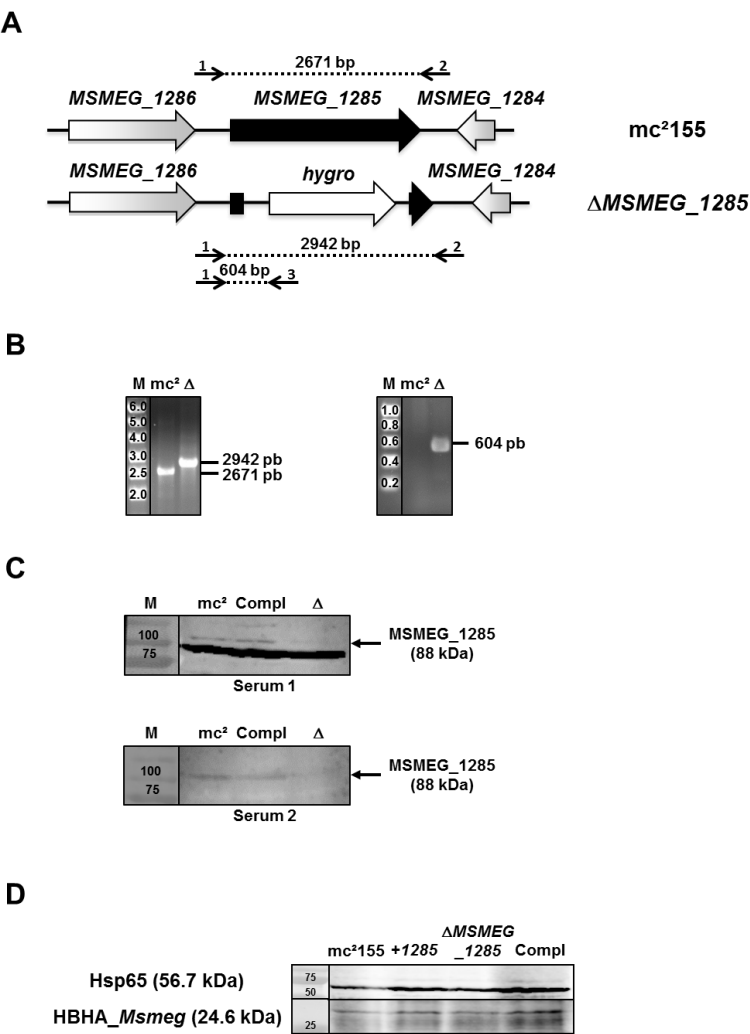

**Supplementary Figure S2.** Generation of the  $\Delta MSMEG_{1285}$  mutant in *Msmeg*  $mc^2155$ . (A) Genomic organization of the *MSMEG\_{1285}* locus in *Msmeg*  $mc^2155$  and schematic representation for the insertion of the hygromycin resistance cassette. The large black arrows depict the *MSMEG\_{1285}* gene (complete, upper line; interrupted, lower line). The grey arrows show the *MSMEG\_{1285}* flanking genes, and the white arrow indicates the hygromycin resistance cassette. The small black arrows symbolize primers 1, 2 and 3 used for PCR verifications. Numbers in bp over the dotted lines indicate the expected base-pair numbers of the PCR fragments; (B) PCR verifications using the pairs of primers (1-2, left panel) and (1-3, right panel) with genomic DNA extracted from *Msmeg*  $mc^2155$  ( $mc^2$ ) and the  $\Delta MSMEG_{1285}$  mutant ( $\Delta$ ). The expected sizes of the PCR amplicons are indicated in bp in the right margins, and the sizes of the size markers are given in the left columns, expressed in kbp; (C) Western-blot analysis using two different sera from Rv0613c-immunized mice on total lysates of *Msmeg*  $mc^2155$ , the complemented strain (Compl) and the  $\Delta MSMEG_{1285}$  mutant; (D) Western-blot analysis using anti-Hsp65 (upper panel) and anti-HBHA 5F2 (lower panel) monoclonal antibodies on total lysates of *Msmeg*  $mc^2155$ , *Msmeg*  $mc^2155$  containing pVV16\_ *MSMEG\_{1285}* (+1285), the  $\Delta MSMEG_{1285}$  mutant and the complemented strain (Compl).

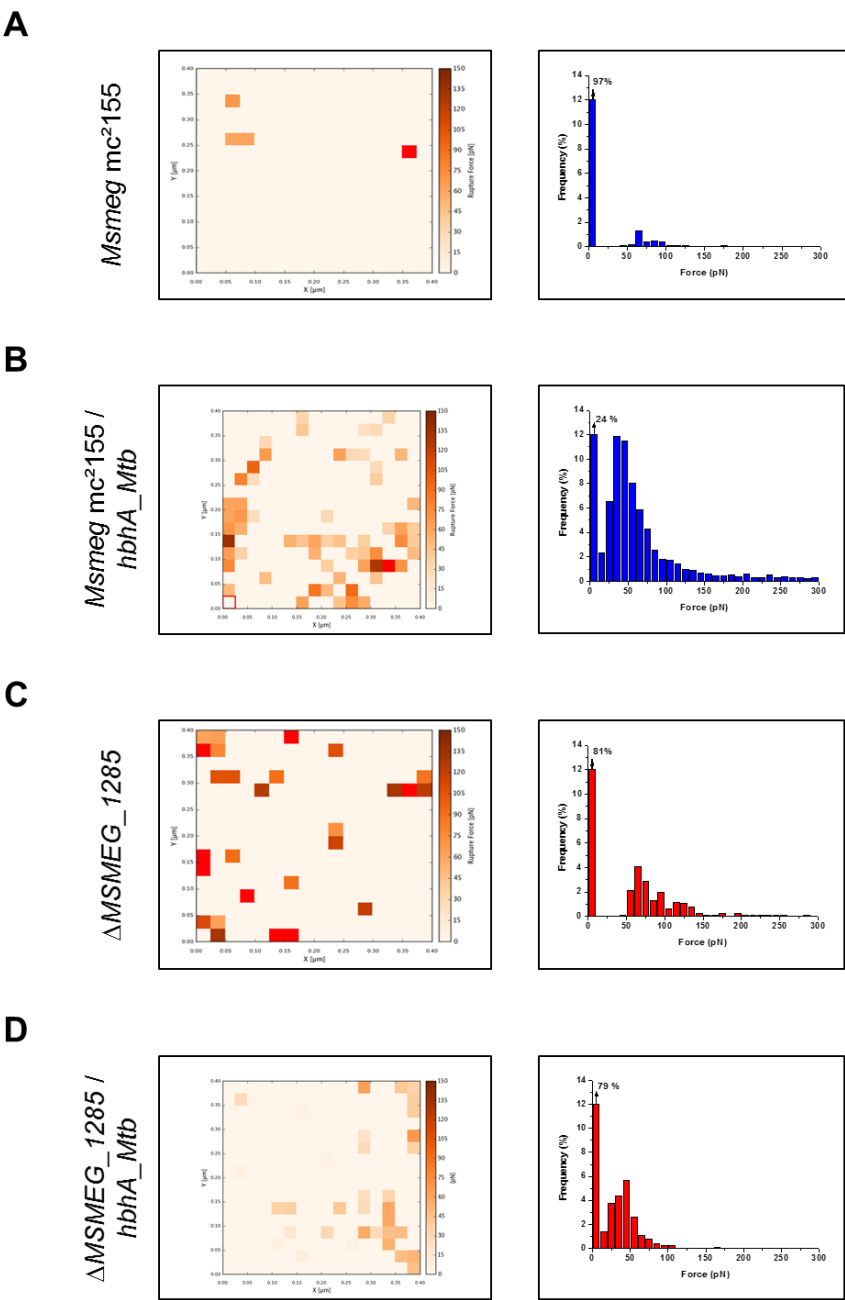

31  
32  
33  
34  
35  
36

**Supplementary Figure S3.** Deletion of *MSMEG\_1285* in *Msmeg mc<sup>2</sup>155* impacts the cell-surface exposure of *HBHA\_Mtb*. Representative spatially-resolved map of adhesion forces recorded with AFM heparin-coated tip (left panel) and corresponding histogram (right panel, obtained from 756 force curves) for (A) the wild-type strain of *Msmeg*, (B) *Msmeg mc<sup>2</sup>155* expressing *hbhA\_Mtb*, (C) the  $\Delta$ *MSMEG\_1285* mutant and (D) the  $\Delta$ *MSMEG\_1285* mutant expressing *hbhA\_Mtb*. All the strains were cultured in Sauton with 0.025% tyloxapol.

**A**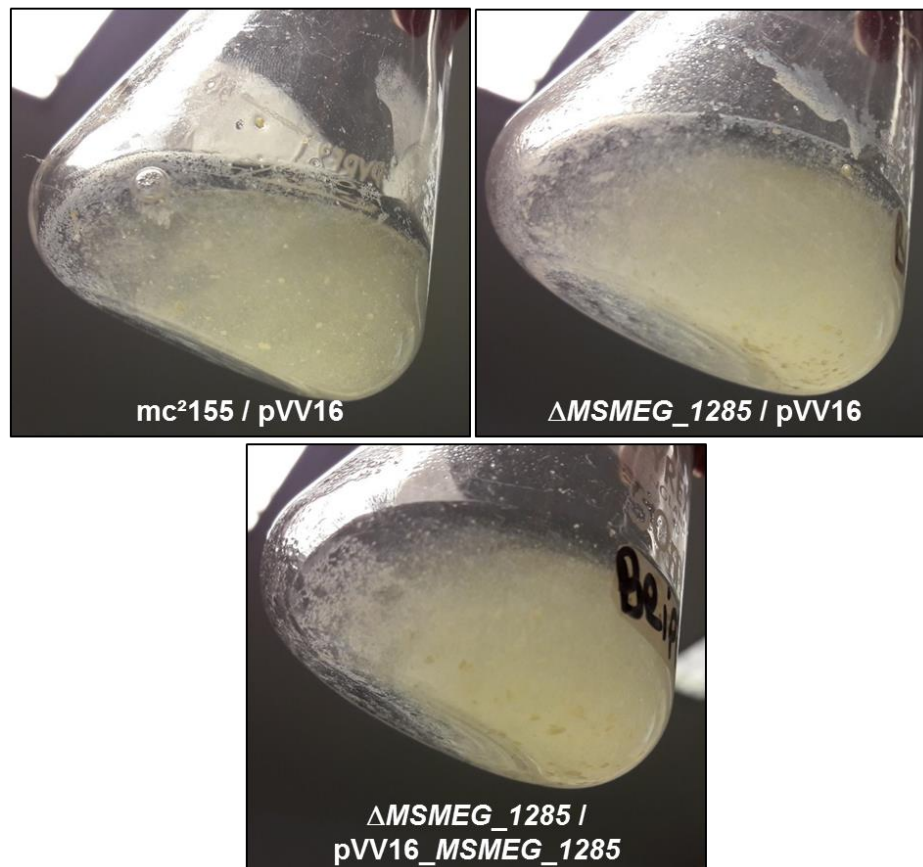**B**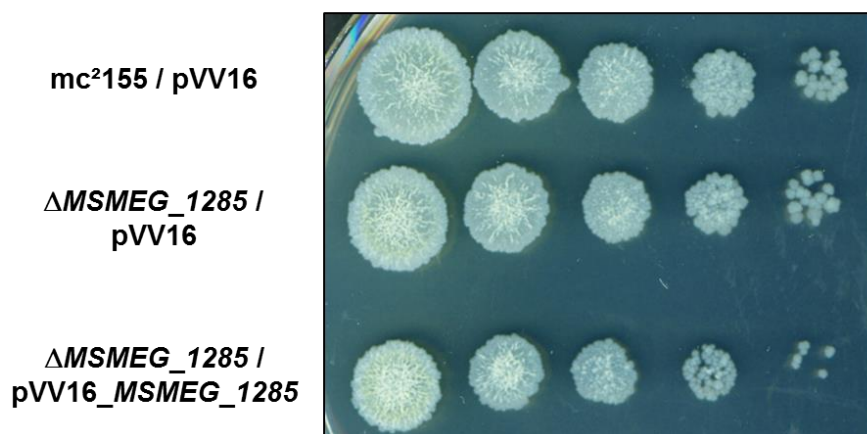

38 **Supplementary Figure S4.** Deletion of *MSMEG\_1285* does not affect auto-aggregation and colony  
 39 morphology of *Msmeg*. (A) Overnight cultures in 7H9 supplemented with OADC and without detergent  
 40 of *Msmeg* mc<sup>2</sup>155,  $\Delta$ MSMEG<sub>1285</sub> mutant and the complemented strain; (B) Serial dilution of *Msmeg*  
 41 mc<sup>2</sup>155 (upper series), the  $\Delta$ MSMEG<sub>1285</sub> mutant (middle series) and the complemented strain (lower  
 42 series) on 7H11 agar plates.

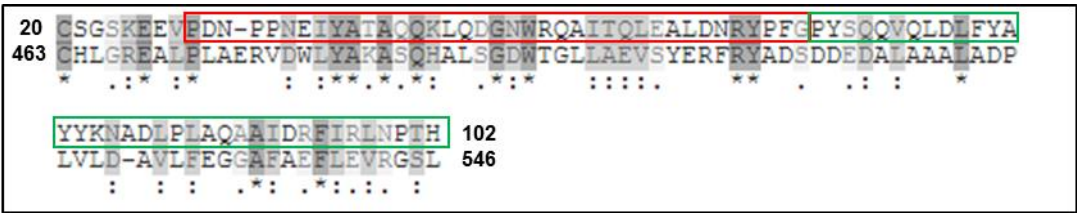

44 **Supplementary Figure S5.** Sequence alignment of the TPR1 and 2 from BamD and Rv0613c. Partial  
45 sequence alignment of BamD (first line) and Rv0613c (second line) using Clustal Omega. The red and  
46 green rectangles corresponds to the TPR1 and TPR2 domains of BamD, respectively. The numbers at the  
47 left and the right indicate the N-terminal and C-terminal amino acid positions, respectively, of the shown  
48 sequences. The grey boxes correspond to the level of similarity between the different amino acids.

49 **Table S1. List of strains and plasmids used in this study.**

50

| Strains and plasmids                                                               | Genotype or description                                                                                                                                                                                                                                                        | Source or reference |
|------------------------------------------------------------------------------------|--------------------------------------------------------------------------------------------------------------------------------------------------------------------------------------------------------------------------------------------------------------------------------|---------------------|
| <i>E. coli</i> TOP10                                                               | F <sup>-</sup> <i>mcrA</i> Δ( <i>mrr</i> - <i>hsdRMS</i> - <i>mcrBC</i> ) φ80 <i>lacZ</i> Δ <i>M15</i> Δ <i>lacX74</i> <i>recA1</i> <i>araD139</i> Δ( <i>ara leu</i> )7697 <i>galU</i> <i>galK</i> <i>rpsL</i> (Str <sup>R</sup> ) <i>endA1</i> <i>nupG</i> , used for cloning | Invitrogen          |
| <i>E. coli</i> DHM1                                                                | F <sup>-</sup> <i>glnV44</i> (AS) <i>recA1</i> <i>endA</i> <i>gyrA96</i> <i>thi-1</i> <i>hsdR17</i> <i>spoT1</i> <i>rfbD1</i> <i>cya</i> -854                                                                                                                                  | [1]                 |
| <i>Msmeg</i> mc <sup>2</sup> 155                                                   |                                                                                                                                                                                                                                                                                | ATCC 700084         |
| <i>Msmeg</i> mc <sup>2</sup> 155 / pVV16                                           | <i>Msmeg</i> mc <sup>2</sup> 155 containing empty vector pVV16                                                                                                                                                                                                                 | This work           |
| <i>Msmeg</i> mc <sup>2</sup> 155 / pVV16_Δ <i>MSMEG</i> _1285                      | <i>Msmeg</i> mc <sup>2</sup> 155 overproducing Δ <i>MSMEG</i> _1285                                                                                                                                                                                                            | This work           |
| <i>Msmeg</i> mc <sup>2</sup> 155 / pMV361                                          | <i>Msmeg</i> mc <sup>2</sup> 155 containing empty vector pMV361                                                                                                                                                                                                                | This work           |
| <i>Msmeg</i> mc <sup>2</sup> 155 / pMV361_Δ <i>hbhA</i> _EGFP                      | <i>Msmeg</i> mc <sup>2</sup> 155 producing the fusion protein Δ <i>HBHA</i> _EGFP                                                                                                                                                                                              | This work           |
| <i>Msmeg</i> mc <sup>2</sup> 155 Δ <i>MSMEG</i> _1285                              | <i>Msmeg</i> mc <sup>2</sup> 155 with a deleted Δ <i>MSMEG</i> _1285 gene                                                                                                                                                                                                      | This work           |
| <i>Msmeg</i> mc <sup>2</sup> 155 Δ <i>MSMEG</i> _1285 / pVV16                      | Deletion mutant Δ <i>MSMEG</i> _1285 containing empty vector pVV16                                                                                                                                                                                                             | This work           |
| <i>Msmeg</i> mc <sup>2</sup> 155 Δ <i>MSMEG</i> _1285 / pVV16_Δ <i>MSMEG</i> _1285 | Complemented strain of <i>Msmeg</i> mc <sup>2</sup> 155 Δ <i>MSMEG</i> _1285                                                                                                                                                                                                   | This work           |
| <i>Msmeg</i> mc <sup>2</sup> 155 Δ <i>MSMEG</i> _1285 / pMV361                     | Deletion mutant Δ <i>MSMEG</i> _1285 containing empty vector pMV361                                                                                                                                                                                                            | This work           |
| <i>Msmeg</i> mc <sup>2</sup> 155 Δ <i>MSMEG</i> _1285 / pMV361_Δ <i>hbhA</i> _EGFP | Deletion mutant Δ <i>MSMEG</i> _1285 producing the fusion protein Δ <i>HBHA</i> _EGFP                                                                                                                                                                                          | This work           |
| pKT25                                                                              | Multicopy <i>E. coli</i> vector encoding the T25 fragment (residues 1-224 of CyaA)                                                                                                                                                                                             | [2]                 |
| pKT25_Δ <i>hbhA</i>                                                                | Multicopy <i>E. coli</i> vector encoding Δ <i>HBHA</i> fused to the T25 fragment of CyaA                                                                                                                                                                                       | This work           |
| pKT25_Δ <i>hbhA</i> <sub>1-109</sub>                                               | Multicopy <i>E. coli</i> vector encoding truncated Δ <i>HBHA</i> (amino acids 1 to 109) fused to the T25 fragment of CyaA                                                                                                                                                      | This work           |
| pUT18C                                                                             | Multicopy <i>E. coli</i> vector encoding the T18 fragment (residues 225-399 of CyaA)                                                                                                                                                                                           | [2]                 |
| pUT18C_Δ <i>rv0613c</i> <sub>314-550</sub>                                         | Multicopy <i>E. coli</i> vector encoding truncated Δ <i>Rv0613c</i> (amino acids 314 to 550) fused to the T18 fragment of CyaA                                                                                                                                                 | This work           |
| pUT18C_Δ <i>mmpL14</i> <sub>519-749</sub>                                          | Multicopy <i>E. coli</i> vector encoding truncated Δ <i>MmpL14</i> (amino acids 519 to 749) fused to the T18 fragment of CyaA                                                                                                                                                  | This work           |
| pJSC347                                                                            | Vector bearing hygromycin resistance cassette and used to generate allelic-exchange substrates                                                                                                                                                                                 | [3]                 |

|                  |                                                                                                                                                           |           |
|------------------|-----------------------------------------------------------------------------------------------------------------------------------------------------------|-----------|
| pJV53            | Multicopy <i>E. coli</i> - mycobacteria shuttle vector allowing for the expression of phage recombinases                                                  | [4]       |
| pVV16            | Multicopy <i>E. coli</i> - mycobacteria shuttle vector, pMV261 derivative allowing for expression of C-terminal <sup>6</sup> His-tagged fusion proteins   | [5]       |
| pVV16_MSMEG_1285 | pVV16 derivative used to produce His-tagged fusion of MSMEG_1285 in mycobacteria, used to complement <i>Msmeg</i> mc <sup>2</sup> 155 $\Delta$ MSMEG_1285 | This work |
| pMV361           | Monocopy <i>E. coli</i> - mycobacteria shuttle vector, <i>hsp60</i> promoter, integrative at <i>attB</i> site                                             | [6]       |
| pMV361_hbhA_EGFP | pMV361 derivative with <i>hbhA</i> and EGFP genes in translational fusion and under the control of the <i>hsp60</i> promoter                              | [7]       |

52     **Table S2. List of primers used in this study.**

53

| Primers                                  | 5' to 3' sequence                            |
|------------------------------------------|----------------------------------------------|
| pKT25_ <i>hbhA</i> _dir                  | TATAGGATCCCGCTGAAAACCTCGAACATTGATGAC (BamHI) |
| pKT25_ <i>hbhA</i> _rev                  | TATAGGTACCTTCTGGGTGACCTTCTTGGC (KpnI)        |
| pKT25_ <i>hbhA</i> <sub>1-109</sub> _rev | TATAGGTACCCGCAGCCGCTCTAGAGCGG (KpnI)         |
| pVV16_MSMEG1285_dir                      | TATACATATGGCCACCGTGACCGACGC (NdeI)           |
| pVV16_MSMEG1285_rev                      | TATAAAGCTTGTCCAACCCCAACGCCGCG (HindIII)      |
| Seq_pUT18C_dir                           | GAGCGGACGTTCTGAAGTTCTC                       |
| Up_MSMEG1285_dir                         | TATATACTAGTGGCCGTATGCGCGGCGCG (SpeI)         |
| Up_MSMEG1285_rev                         | TATAAAGCTTCCAAATCGCCCTCGGCCGC (HindIII)      |
| Down_MSMEG1285_dir                       | TATATATCTAGACTACGTGCGCGCCGACGAC (XbaI)       |
| Down_MSMEG1285_rev                       | TATAAGGCCTGGCTTTTCGGCTCACCGACG (StuI)        |
| Seq_ΔMSMEG1285_1                         | GAGGTGCGCCAATATCTGCTG                        |
| Seq_ΔMSMEG1285_2                         | GCGCCATCGTGCAGGCCTG                          |
| Seq_ΔMSMEG1285_3                         | CAGGACCTGCAGGCATGCAAGC                       |

54



55     **References**

- 56     1.     Karimova, G.; Dautin, N.; Ladant, D., Interaction network among *Escherichia coli* membrane proteins  
57         involved in cell division as revealed by bacterial two-hybrid analysis. *J Bacteriol* **2005**, 187, (7), 2233-43.  
58     2.     Karimova, G.; Ullmann, A.; Ladant, D., Protein-protein interaction between *Bacillus stearothermophilus*  
59         tyrosyl-tRNA synthetase subdomains revealed by a bacterial two-hybrid system. *J Mol Microbiol Biotechnol*  
60         **2001**, 3, (1), 73-82.  
61     3.     Sambandamurthy, V. K.; Wang, X.; Chen, B.; Russell, R. G.; Derrick, S.; Collins, F. M.; Morris, S. L.; Jacobs,  
62         W. R., Jr., A pantothenate auxotroph of *Mycobacterium tuberculosis* is highly attenuated and protects  
63         mice against tuberculosis. *Nat Med* **2002**, 8, (10), 1171-4.  
64     4.     van Kessel, J. C.; Marinelli, L. J.; Hatfull, G. F., Recombineering mycobacteria and their phages. *Nat Rev*  
65         *Microbiol* **2008**, 6, (11), 851-7.  
66     5.     Jackson, M.; Crick, D. C.; Brennan, P. J., Phosphatidylinositol is an essential phospholipid of mycobacteria.  
67         *J Biol Chem* **2000**, 275, (39), 30092-9.  
68     6.     Stover, C. K.; de la Cruz, V. F.; Fuerst, T. R.; Burlein, J. E.; Benson, L. A.; Bennett, L. T.; Bansal, G. P.; Young,  
69         J. F.; Lee, M. H.; Hatfull, G. F.; et al., New use of BCG for recombinant vaccines. *Nature* **1991**, 351, (6326),  
70         456-60.  
71     7.     Raze, D.; Verwaerde, C.; Deloison, G.; Werkmeister, E.; Coupin, B.; Loyens, M.; Brodin, P.; Rouanet, C.;  
72         Locht, C., Heparin-binding Hemagglutinin Adhesin (HBHA) is involved in intracytosolic lipid inclusions  
73         (ILI) formation in mycobacteria. Manuscript in preparation.

74
